# Supplementary material
Source: PubMed Central journal article supplement (PMC6776082)
Supplement: NIHMS1052089-supplement-1.pdf [file NIHMS1052089-supplement-1.pdf]

## Appendix 1.

### Quantitative Survey Questions –Intervention participants and Caregivers regarding EPAC

1. Since enrollment, did you ever talk to the Lay Health Worker?
  - Yes → GO TO QUESTION #3
  - No → ANSWER #2 ONLY
  
2. Why didn't you talk with the Lay Health Worker? (check all that apply)
  - You weren't interested
  - You didn't have the time
  - You already had enough information
  - You didn't think it would be helpful
  - You didn't know about it
  - You called her but she did not call back
  - Other reason \_\_\_\_\_
  
3. Since enrollment, how often did you talk with the Lay Health Worker?
  - One time
  - Two times
  - Three times
  - Four times
  - Five times
  - Six times
  - Seven times
  - Eight times
  - Nine times
  - Ten times
  - >Ten times (write in \_\_\_\_\_)
  
4. Since enrollment, how helpful did you find the Lay Health worker to be during your (or your loved one's) cancer care?
  - Very Helpful
  - Helpful
  - Somewhat helpful
  - Not at all helpful
  
5. Would you recommend that the VA continue to have the Lay health worker available during your (or your loved one's) cancer care?
  - Yes
  - NO
  
6. How often did you initiate contact with the Lay Health Worker aside from when the Lay health worker contacted you?
  - None → GO TO QUESTION #8
  - 1 time
  - 2 times
  - 3 times
  - 4 times
  - 5 times

6 or more times (write in \_\_\_\_\_)

7. How easy was it to make contact with the Lay health worker?

- Very Easy
- Easy
- Somewhat easy
- Not at all easy

8. Would you recommend the Lay Health Worker for other patients?

- Yes
- No
