# Supplementary material
Source: PubMed Central journal article supplement (PMC6776082)
Supplement: NIHMS1052089-supplement-2.pdf [file NIHMS1052089-supplement-2.pdf]

## **Appendix 2. Interview Guide.**

Interviewer: Makes introduction and engages the caregiver by helping him/her feel comfortable.

### Patient:

I know you have been having discussions with the oncology lay health worker and I was hoping to ask you a little more about discussions you may have had, specifically any conversations you've had with your lay health worker about care you would or wouldn't want to receive in case you got really sick, so sick you couldn't speak for yourself. Your name won't be on this and it will remain private. Is it all right with you if we talk about this? Is it ok if I record our conversation?

1. Describe your overall experience with cancer care.
2. Describe your experiences with the lay health worker program. Probes: Did the program make bring up any issues regarding the care you might or might not want if you got sick? Have you seen one of these (Health Care Advance Directives form)? Have you used these forms?
3. Could you tell me more about your conversations during the program? Probes: Did you write anything down? Did you share these conversations with your family? Did you share these conversations with your healthcare team?
4. Describe your experiences with this kind of program?
5. Can you describe what aspects of these conversations were helpful? What aspects were not so helpful?
6. Can you describe your comfort in discussing these conversations? Probe: How did the program play a role in this?
7. How do you think the program affected your cancer care?

### Caregiver of Deceased Patient:

I know [insert name of deceased patient] had discussions with the oncology lay health worker at the VA. I was hoping to ask you to reflect back on these discussions and to understand a little more about discussions you may have had, specifically any conversations you may have had with [insert name of deceased patient] and any discussions you personally may have remembered with the lay health worker program he/she was enrolled in. Specifically, I was hoping that you may reflect back on the conversations about care that [insert name of deceased patient] would or wouldn't want to have received at the end-of-life. Your name won't be on this and it will remain private. Is it okay with you if we talk about this? Is it ok if I record our conversation?

1. Describe your overall experience with [insert deceased patient name]'s cancer care. Probe: What do you remember most about the care that he/she received? What do you remember most about the care that he/she received at the end-of-life specifically in the last month of his/her life?
2. Describe your personal experiences with discussing [insert deceased patient name]'s care preferences at the end of life. Can you also describe what experiences [insert deceased patient name]'s may have had with the lay health worker program. Can you describe your own personal experiences with the program? Probes: Did you discuss any issues regarding the care [insert deceased patient name]'s might or might not want if you he/she was to have gotten sick? Did the care he/she have match up with what he/she discussed with you? Did [insert deceased patient name]'s discuss Health Care Advance Directives form with you? Have you personally used these forms?
3. Describe your experiences with [insert deceased patient name]'s care planning? Probes: What made care planning helpful? What was most difficult about care planning? How do you think the program may have influenced the care planning? How do you think the program may have hindered the care planning? What could have been done better?
4. Can you describe what aspects of conversations about [insert deceased patient name]'s care preferences were helpful? What aspects were not so helpful?
5. Do you think these conversations are important? If so, why? Probe: Do you think the program was helpful here and how? Why?

6. How do you think the program affected the care that [insert deceased patient name] experienced at the end-of-life?
